# Supplementary material for: Parallel laboratory evolution and rational debugging reveal genomic plasticity to S. cerevisiae synthetic chromosome XIV defects
Source: PubMed Central journal article supplement (PMC10667330; doi:10.1016/j.xgen.2023.100379), 2023-11-09
Supplement: mmc1.pdf [file mmc1.pdf]

**Supplemental information**

**Parallel laboratory evolution and rational  
debugging reveal genomic plasticity  
to *S. cerevisiae* synthetic chromosome XIV defects**

**Thomas C. Williams, Heinrich Kroukamp, Xin Xu, Elizabeth L.I. Wightman, Briardo Llorente, Anthony R. Borneman, Alexander C. Carpenter, Niel Van Wyk, Felix Meier, Thomas R.V. Collier, Monica I. Espinosa, Elizabeth L. Daniel, Roy S.K. Walker, Yizhi Cai, Helena K.M. Nevalainen, Natalie C. Curach, Ira W. Deveson, Timothy R. Mercer, Daniel L. Johnson, Leslie A. Mitchell, Joel S. Bader, Giovanni Stracquadanio, Jef D. Boeke, Hugh D. Goold, Isak S. Pretorius, and Ian T. Paulsen**

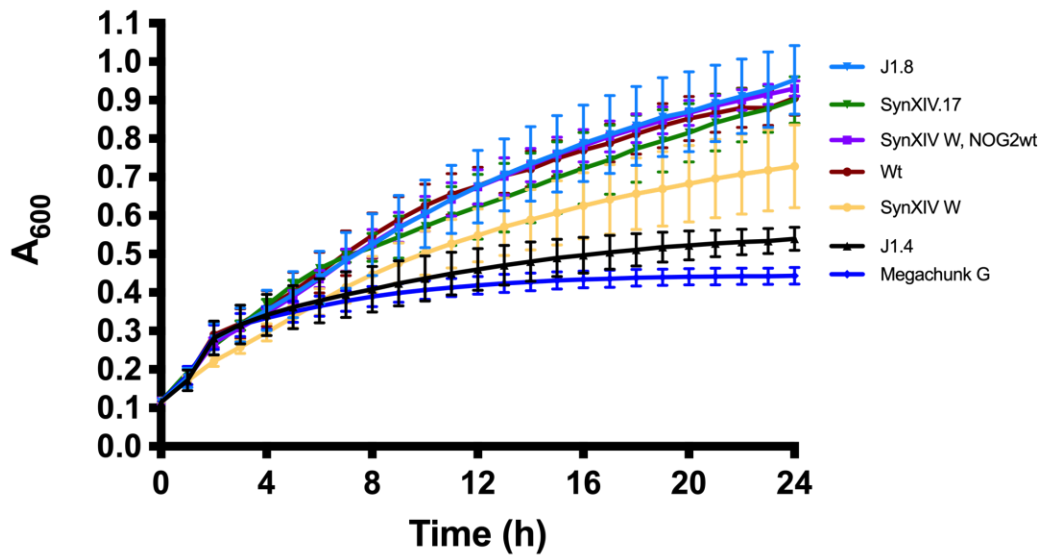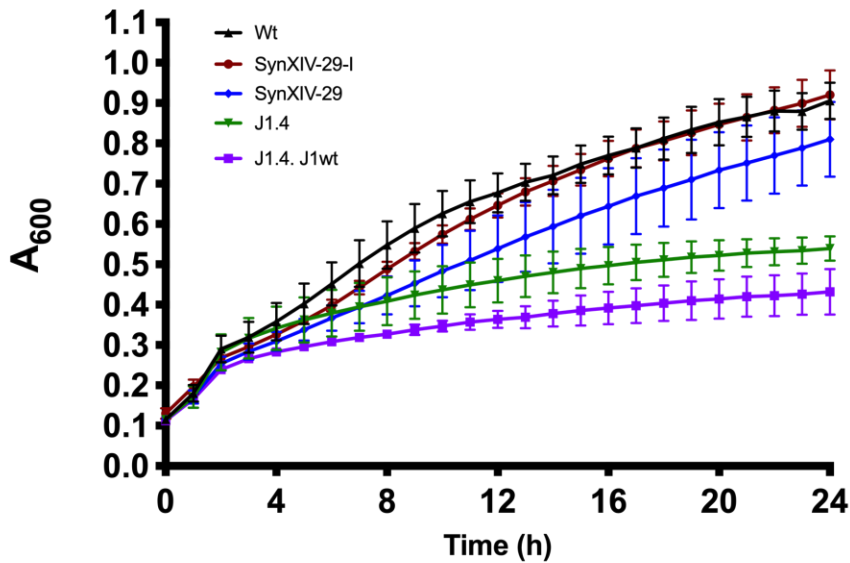

**Figure S1. Fitness testing of major intermediate and defective strains made during *synXIV* construction**

(A) Strains J1.8 (strain 40, Table S1), SynXIV.17 (strain 55, Table S1), SynXIV W, NOG2wt (strain 63, Table S1), Wt (strain 1 Table S1), SynXIV W (strain 57, Table S1), J1.4 (strain 39, Table S1), and megachunk G (strain 22, Table S1) were tested for fitness in liquid YPG medium. (B) Liquid medium fitness test of strains involved in the lead-up to the discovery of the *MRPL19* loxPsym defect (strains 37, 38, 39, 79 Table S1). Lines and error bars represent mean and  $\pm 1$  standard deviation of biological triplicate cultures. Related to Figure 1.

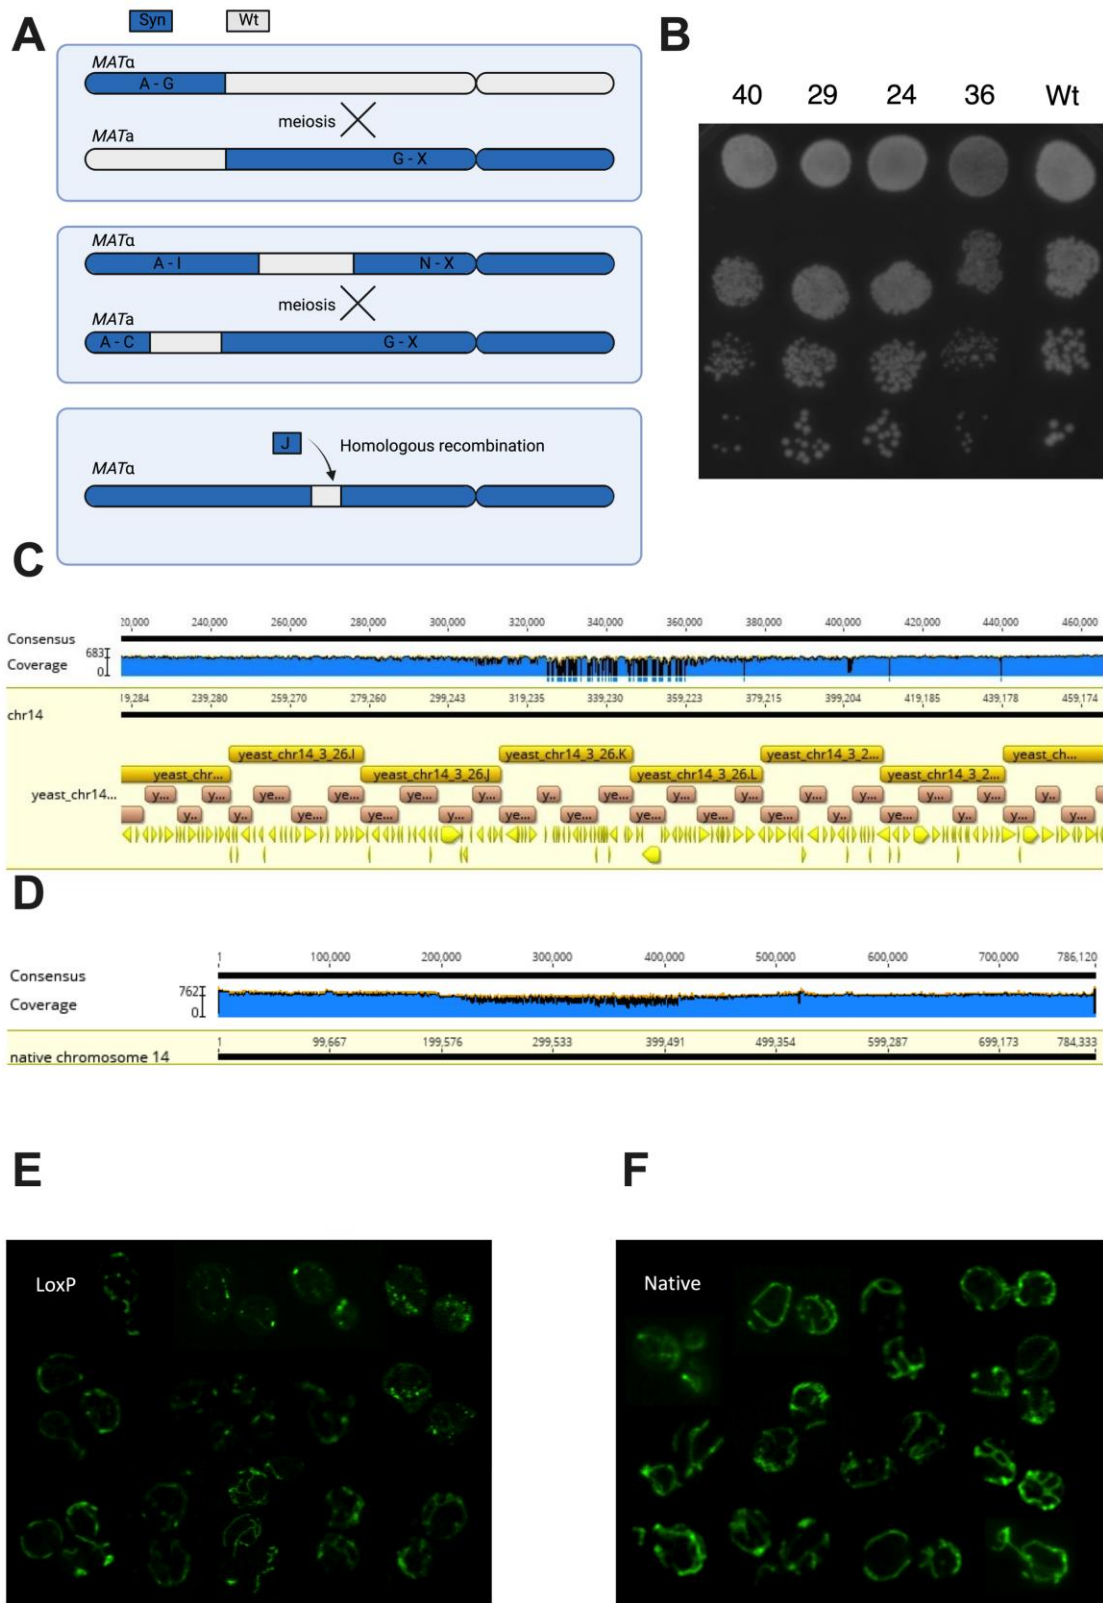

**Figure S2. Pooled backcross sequencing and synthetic chromosome strain crossing reveals a fitness defect in megachunk J**

(A) Megachunks A to X were integrated across two separate strains in parallel, with *URA3* and *MET17* markers integrated at the *YNL223W* and *YNR063W* wild-type loci of the synthetic A-G strain (strain 31, Table 3), respectively, prior to crossing with a synthetic G-X strain (strain 22, Table 3). Haploid strains resulting from the first cross (34 and 35, Table 3) were crossed together with screening for *LEU2*

(*YNL125C* locus) and *URA3* marker (*YNL269W* locus) loss from wild-type regions to give a fully synthetic version of chromosome XIV. **(B)** Haploid progeny of a meiotic cross between two partially synthetic versions (A-G and G-X) of synXIV (colonies 40, 29, 24, 36) were tested for fitness alongside a BY4741 control (Wt) on YPD agar at 30°C for 3 d. Colonies 40 and 36 contain fully synthetic chromosome XIV, while colonies 29 and 24 contain synthetic DNA in all megachunk regions except I-J and J respectively. **(C)** Pooled sequencing of ‘fast’ growing haploid progeny of a cross between synthetic chromosome XIV strain G-X and BY4742. Each set of reads were aligned to a reference S288c genome that also had a copy of the synthetic chromosome XIV sequence. **(D)** ‘Slow’ reads mapping to native chromosome XIV, with low-coverage regions equivalent to synXIV megachunk regions H to L. Dark yellow annotations correspond to megachunk regions while pink represent chunks, and yellow coding sequences. Average sequence coverage was 183 for the ‘Fast’ pool and 218 for the ‘Slow’. Chromosome annotation and coverage graphs were generated using Geneious Pro Software. **(E)** Versions of the *MRPL19*-GFP fusion genes were designed with *LoxP* and **(F)** without *LoxP*sym motifs in the 3′ UTR GFP and expressed from pRS416 in the wild-type BY4741 strain. GFP fluorescence and distribution was visualised using an Olympus FV 1000 confocal laser-scanning microscope. Microscopy images were analysed using ImageJ (<https://imagej.nih.gov/ij/index.html>). Images shown are representative of cells in independent biological triplicate populations. Related to Figure 2.

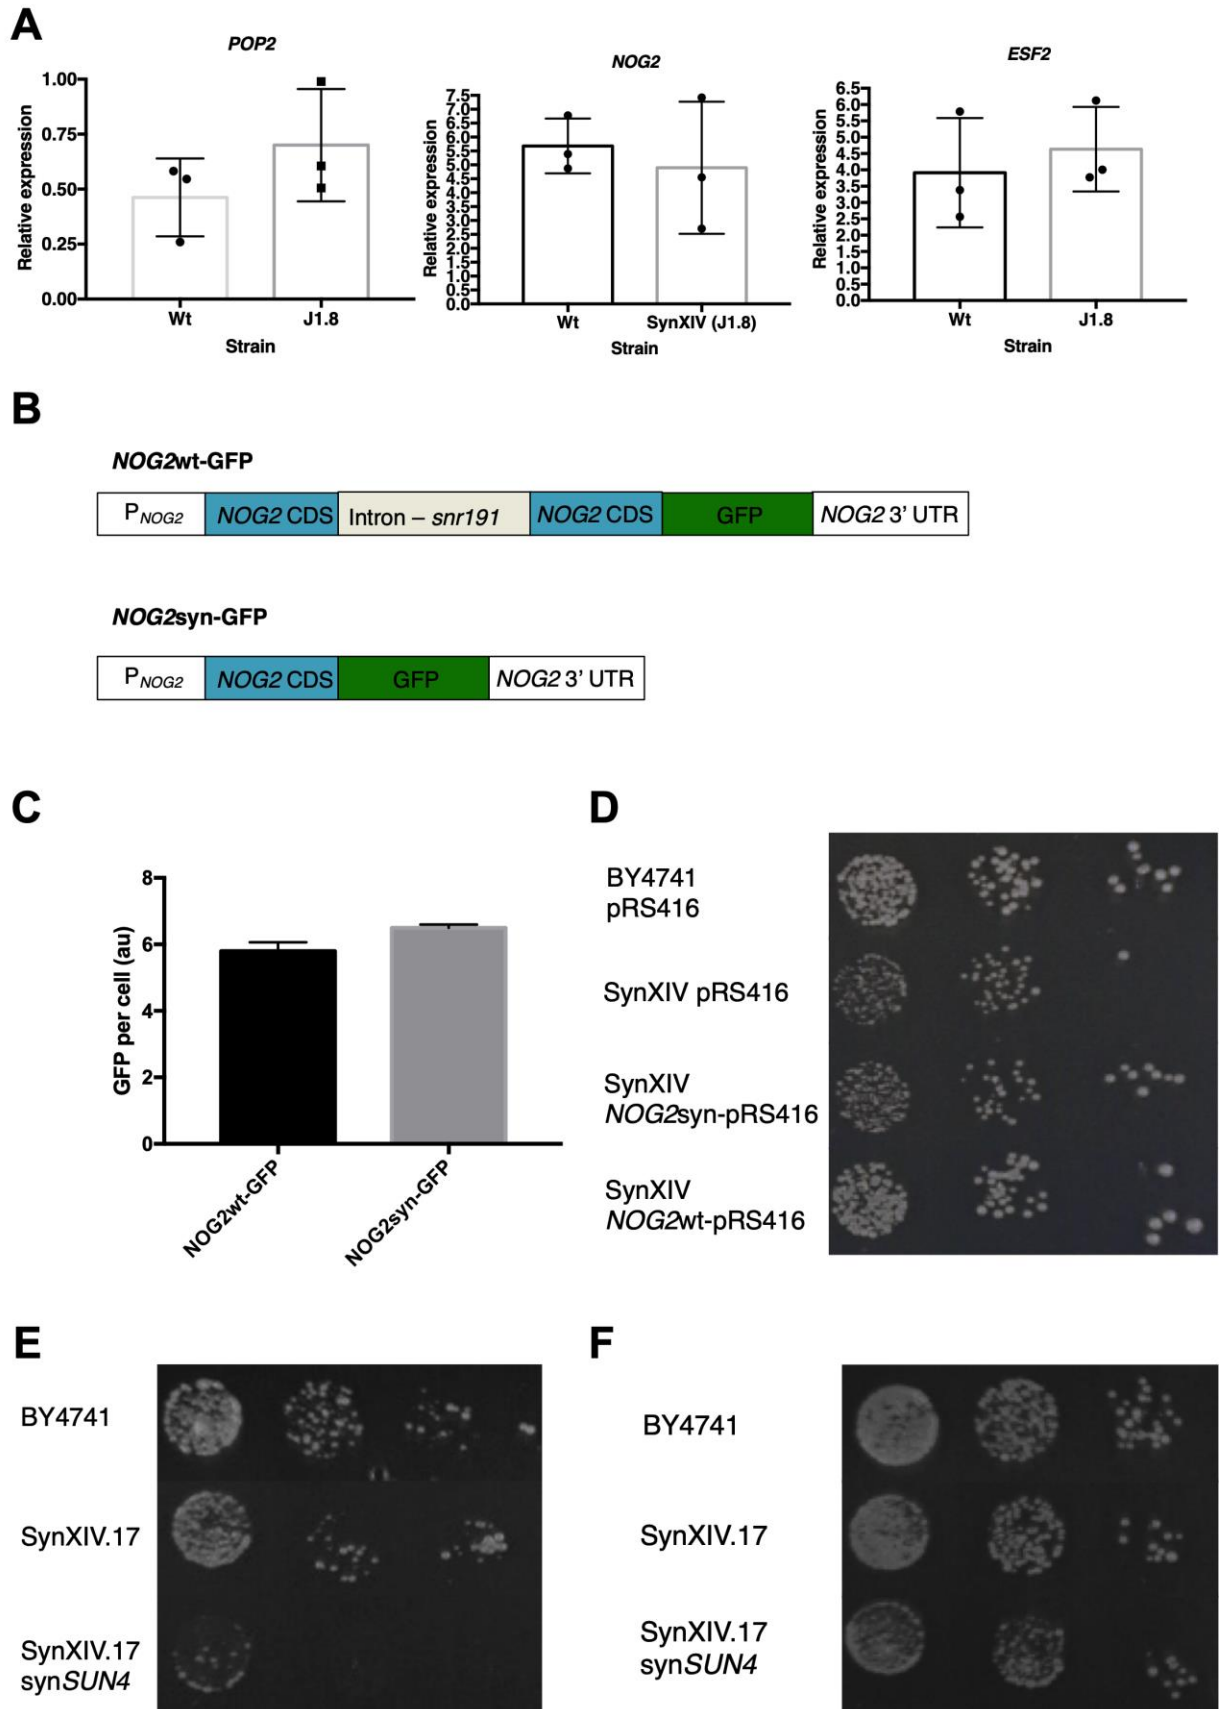

**Figure S3. Expression of the *NOG2* and *SUN4* introns restores fitness**

(A) mRNA levels of the three genes on chunk W1 were quantified using RT-qPCR. (B) Synthetic *NOG2-GFP* fusion expression constructs with and without the intron encoded *snr191* gene were designed and (C) tested for changes in protein expression in the wild-type (strain 1, Table 3). (D)

Expression of *NOG2-GFP* with its intron (strain 61, Table 3) but not without it (strain 62, Table 3) restores growth to wild-type levels in *synXIV* on YP-glycerol medium at 37°C. Images were taken after three days. RT-qPCR and GFP fluorescence levels are reported as the mean of triplicate cultures with error bars plus or minus one standard deviation. (E) Serial 10-fold dilutions of wild-type (BY4741), *SynXIV* (strain 63, Table 3), and *SynXIV* with the *SUN4* intron removed (strain 64, Table 3) on powdered yeast extract, and (F) on granulated yeast extract. Strains were plated on YP-glycerol (YPG) with non-granulated yeast extract (Merck 70161) at 37°C for 4 d prior to imaging. Related to Figure 4.

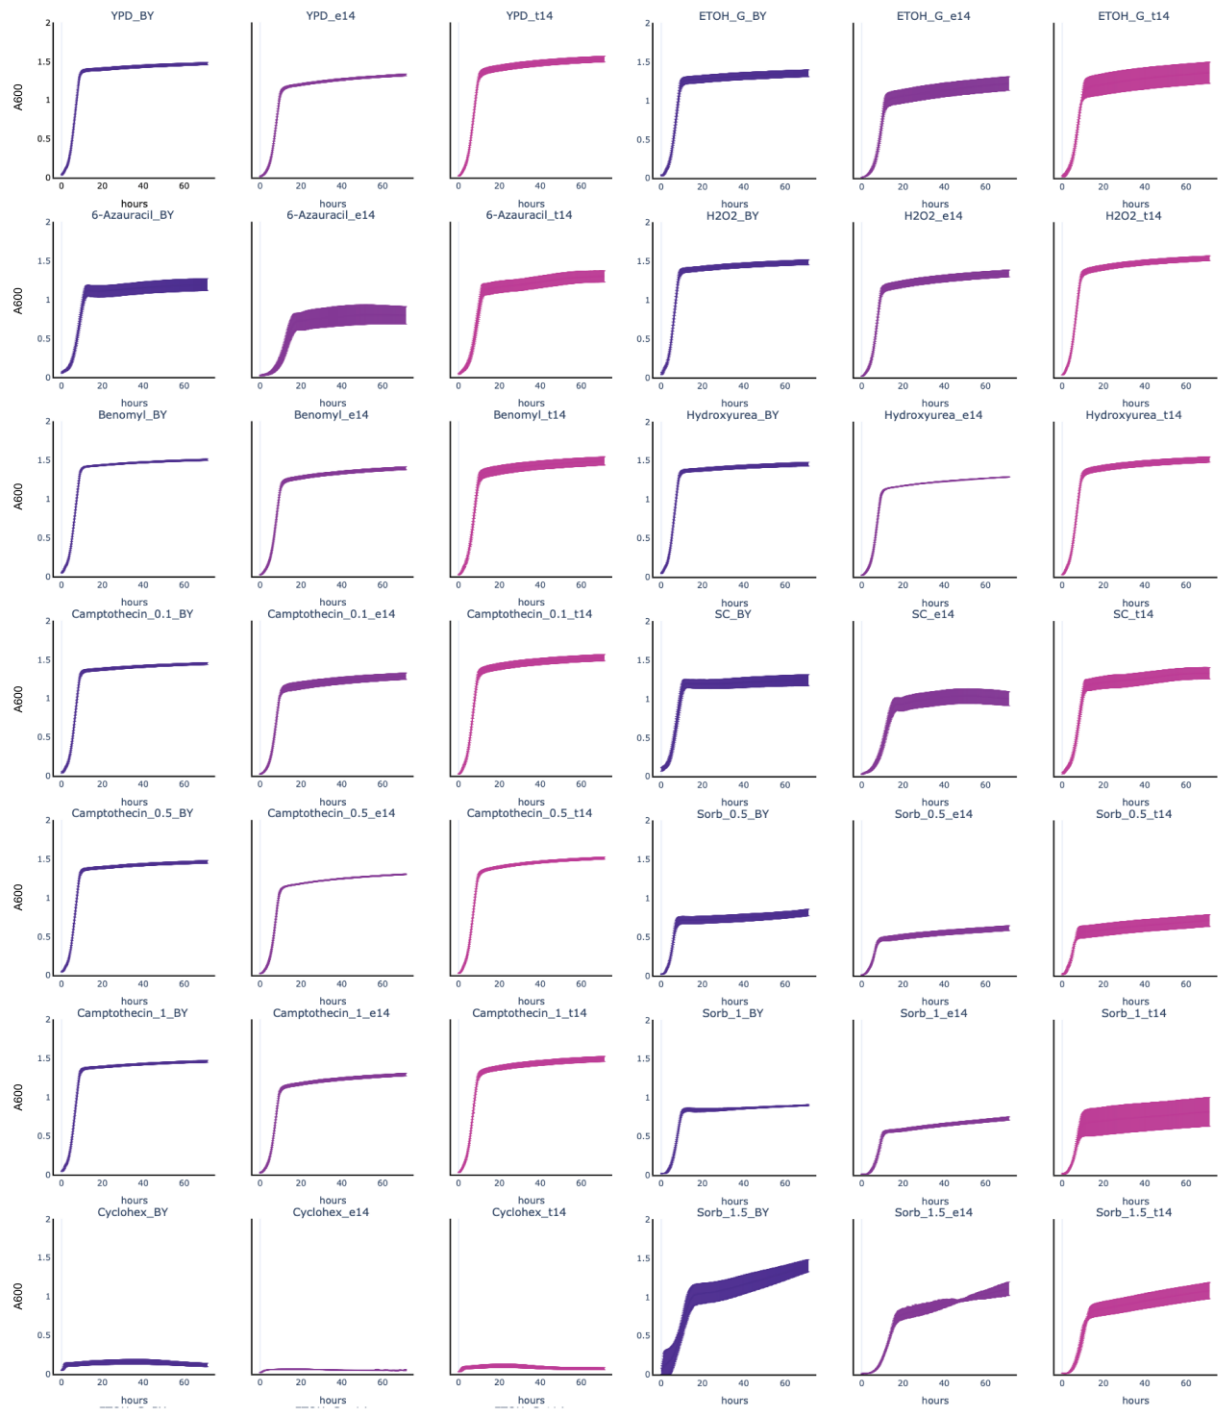

**Figure S4. Fitness testing of final synXIV strain on different liquid media**

Wild-type (BY4741 strain 75, Table S1), synXIV (strain 76, Table S1), and synXIV with tRNA genes reintroduced (strain 77, Table S1) were fitness tested in parallel on solid YPD, YPGE (1% Yeast extract 2% Peptone, 2% Glycerol, 2% Ethanol), or SC (Synthetic Complete) media with the indicated additives. YPD was used as the base medium for testing sorbitol, hydroxyurea, hydrogen peroxide, benomyl, 6-Azauracil, camptothecin, and cycloheximide. Lines and error bars represent mean and standard deviation from three biological replicates. Related to Figure 5.

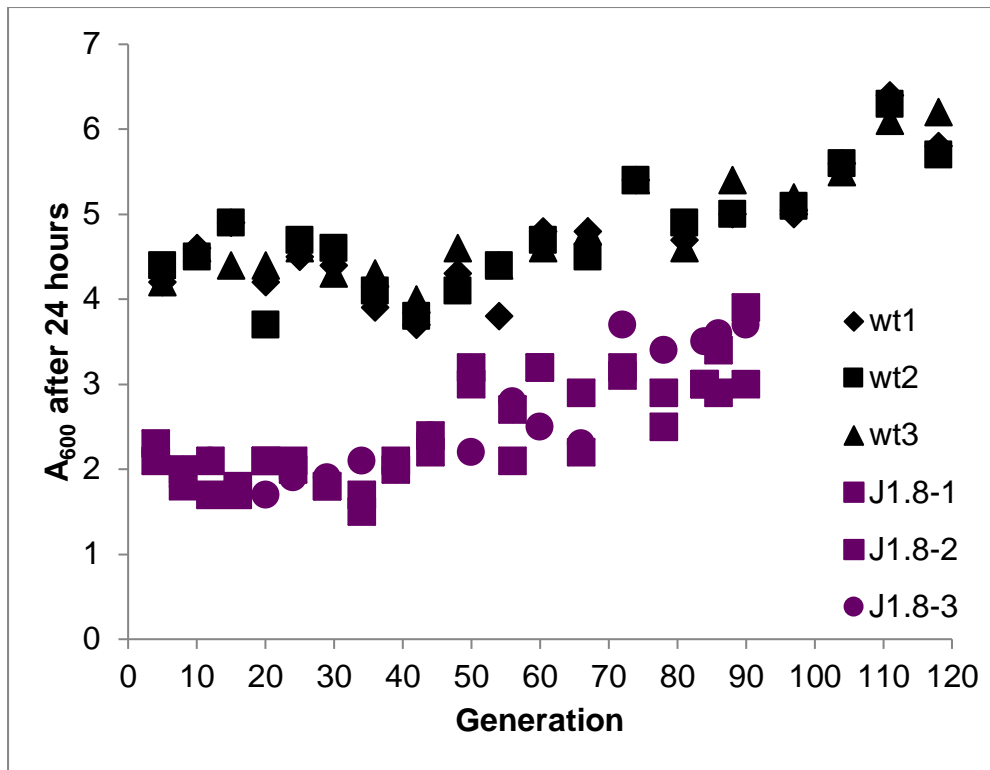

**Figure S5. Fitness tracking of Adaptive Laboratory Evolution strains**

A<sub>600</sub> of three independent lineages for the BY4741 wild-type (strain 1 Table S1) and syn14 J1.8 strains (strain 40, Table S1) was measured every 24 h to track fitness and generation numbers in YP-glycerol medium. Related to Figure 6.



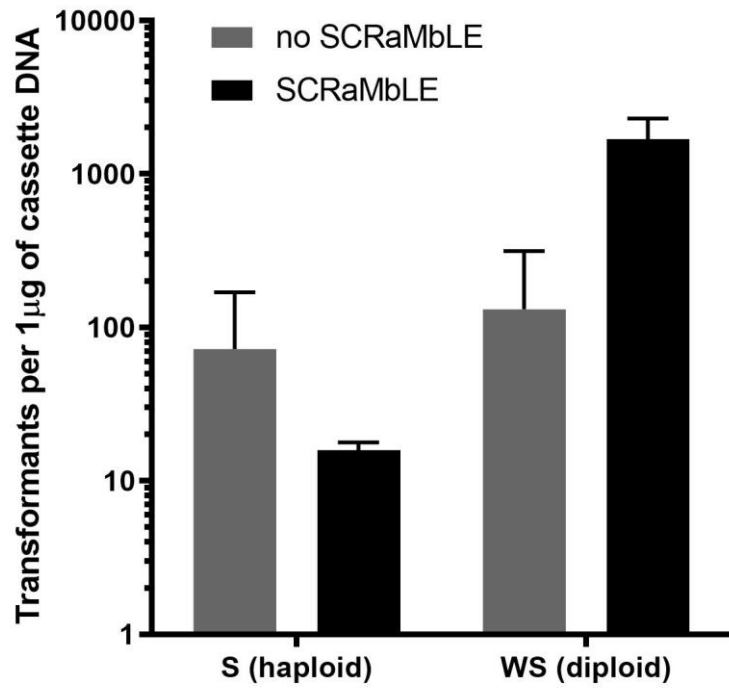

**Figure S6. SCRaMbLE-mediated genome integration of a transformed *URA3* marker gene**

Transformation efficiency in SCRaMbLE induced and uninduced haploid (strain 80, Table S4) and diploid strains (strain 86, Table S4). Both strains have the same number of synthetic chromosomes and, by extension, same number of available *loxP*sym integration sites. Related to Figure 7.

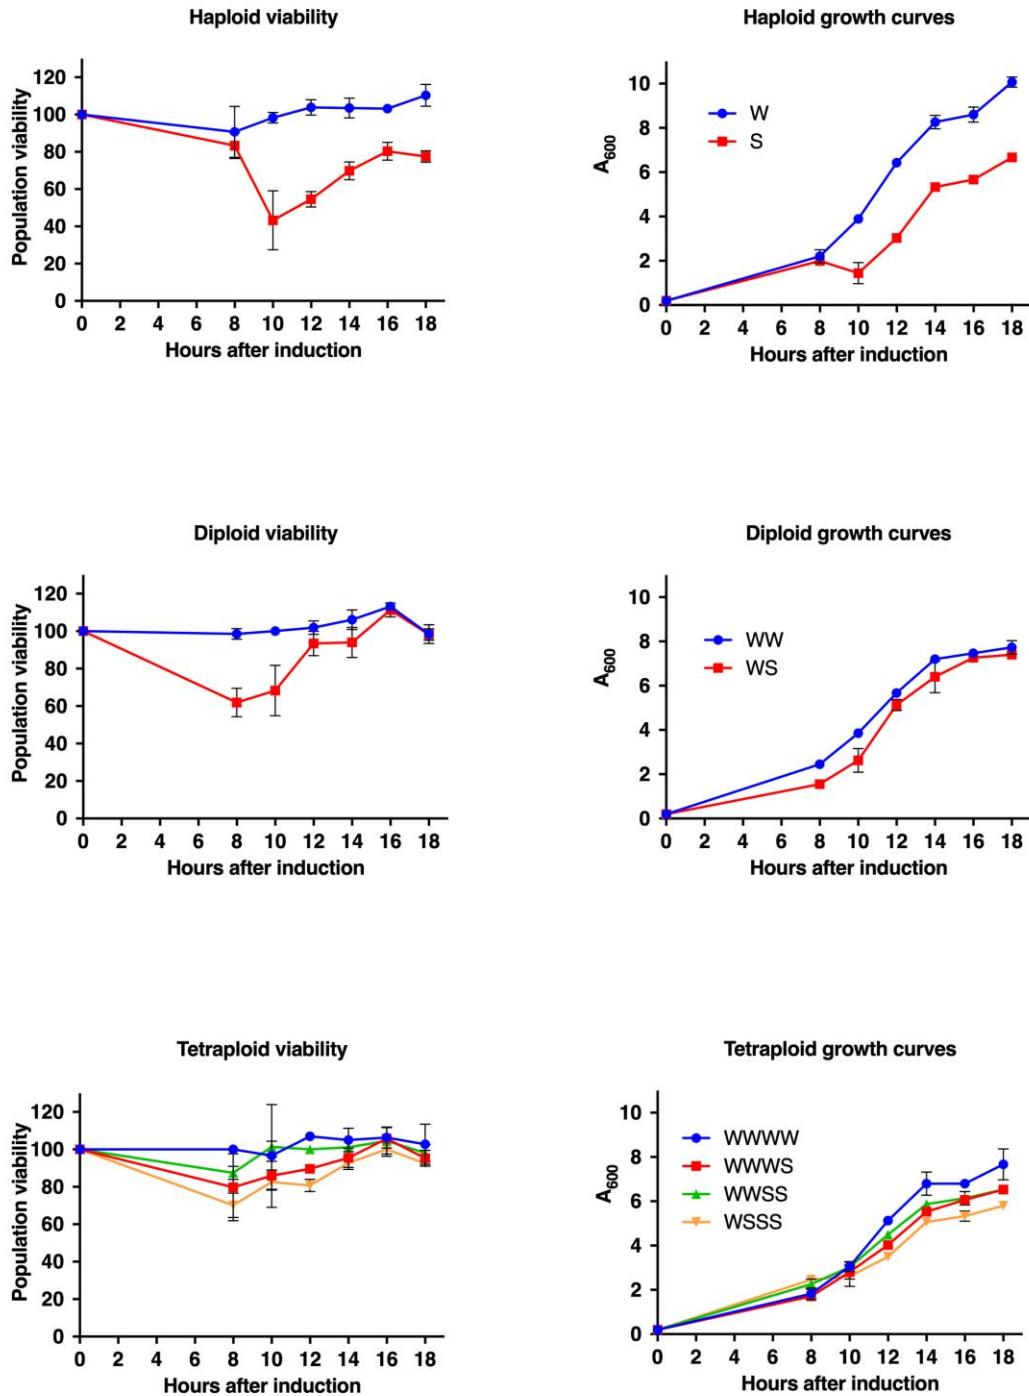

**Figure S7. Growth and viability after SCRaMbLE of synthetic polyploid strains**

The difference in cell density between SCRaMbLE'd and non-SCRaMbLE'd synthetic and wild-type cells of each strain were plotted for the haploid (A), diploid (C) and tetraploid (E) strains. The growth profiles of haploid (B), diploid (D) and tetraploid (F) strains in the presence of 1 $\mu$ M estradiol are shown. Data points and errors bars represent mean and standard deviation from three biological replicates. Related to Figure 7.

**Table S2. Corrected sequence discrepancies in final synXIV strain, relates to STAR Methods.**

Whole genome sequencing of synXIV strain revealed a number of missing Sc2.0 features and point mutations that deviated from the intended synXIV sequence. A subset of these were selected for repair according to their relative importance to the project, and ease of re-introduction. All missing TAA stop codons were repaired, as this modification will serve to free up the TAA codon to encode for non-natural amino acids in the future. All non-synonymous mutations in open reading frames were repaired to enable functional expression of the relevant proteins. Some missing loxP sites were corrected if they were nearby other features already being repaired, but were otherwise left as-is due to the fact that SCRaMBLE has a high degree of redundancy. PCR-tags are only used to verify the correct insertion of megachunks during the construction phase and were therefore left unaltered if missing, unless they were nearby another fix. Synonymous point mutations in open reading frames were also left unaltered.

| Discrepancy Number | Discrepancy type                     | Original chunk/chromosome location | Gene(s)           | Protein affect |
|--------------------|--------------------------------------|------------------------------------|-------------------|----------------|
| 1                  | T to C substitution                  | A3, 12735 bp                       | <i>YNL329C</i>    | R276G          |
| 2                  | T insertion                          | A3, 13932 bp                       | <i>YNL328C</i>    | Frame-shift    |
| 3                  | T to G substitution                  | A3, 13944 bp                       | <i>YNL328C</i>    | N98H           |
| 4                  | C to T substitution                  | A3, 18438 bp                       | <i>YNL326C</i>    | R302Q          |
| 5                  | G to T substitution                  | A3, 18512 bp                       | <i>YNL326C</i>    | F277L          |
| 6                  | A to G substitution                  | A3, 18709 bp                       | <i>YNL326C</i>    | Y212H          |
| 7                  | T insertion                          | A4, 19902 bp                       | <i>YNL325C</i>    | Frame-shift    |
| 8                  | A to G substitution                  | A4, 22042 bp                       | <i>YNL325C</i>    | synonymous     |
| 9                  | G to A transition                    | A4, 25505 bp                       | <i>intergenic</i> | -              |
| 10                 | G to A substitution                  | A4, 26370 bp                       | <i>YNL321W</i>    | synonymous     |
| 11                 | Missing TAA stop codon               | B4, 52811 bp                       | <i>YNL304W</i>    | synonymous     |
| 12                 | Missing LoxP site                    | D4, 121257 bp                      | <i>YNL270C</i>    | -              |
| 13                 | Missing TAA stop codon and LoxP site | E1, 125772 bp                      | <i>YNL268W</i>    | synonymous     |

|    |                                        |                                              |                   |                                                  |
|----|----------------------------------------|----------------------------------------------|-------------------|--------------------------------------------------|
| 14 | T to A substitution                    | E1, 125952 bp                                | <i>intergenic</i> | -                                                |
| 15 | C to T substitution                    | E3, 110,759 bp                               | <i>YNL261W</i>    | T377I                                            |
| 16 | T to C substitution                    | K3, 336, 837 bp                              | <i>YNL149C</i>    | None, TAA to TAG stop codon                      |
| 17 | Missing TAA stop codon                 | M3, 400807 bp                                | <i>YNL113C</i>    | synonymous                                       |
| 18 | Missing <i>Bsu36I</i> restriction site | M3-M4, 401355 bp                             | <i>YNL112W</i>    | synonymous                                       |
| 19 | T to C substitution                    | R1, 539,674 bp                               | <i>YNL037C</i>    | T295A                                            |
| 20 | Chunk V1 missing                       | V1, 2972 bp deletion beginning at 663,572 bp |                   | YNR034 and YNR034W looped out between LoxP sites |
| 21 | Missing LoxP site                      | V4, 690721 bp                                | <i>YNR051C</i>    | -                                                |
| 22 | Missing TAA stop codon                 | V4, 690758 bp                                | <i>YNR051C</i>    | synonymous                                       |
| 23 | Missing PCR-tag                        | V4, 690776 bp                                | <i>YNR051C</i>    | synonymous                                       |
| 24 | Duplication on chromosome 12           | <i>ECM22</i> to <i>HAP1</i>                  |                   |                                                  |

**Table S3. Plasmids used in this study, relates to STAR Methods**

| <b>Name</b>                             | <b>Details</b>                                                                                                                            | <b>Origin</b>                           |
|-----------------------------------------|-------------------------------------------------------------------------------------------------------------------------------------------|-----------------------------------------|
| pRS415                                  | Yeast centromeric plasmid, <i>LEU2</i> marker                                                                                             | Euroscarf<br>(Sikorski and Hieter 1989) |
| pRS416                                  | Yeast centromeric plasmid, <i>URA3</i> marker                                                                                             | Euroscarf<br>(Sikorski and Hieter 1989) |
| pRS413                                  | Yeast centromeric plasmid, <i>HIS3</i> marker                                                                                             | Euroscarf<br>(Sikorski and Hieter 1989) |
| <i>TAR1</i> -pRS413                     | <i>TAR1</i> expression from native promoter on the pRS416 plasmid                                                                         | This study                              |
| <i>pWAR1-crRNA-cas9</i> -pRS423         | <i>WAR1</i> promoter targeting guide RNA and Cas9 expression from the pRS423 plasmid. Template DNA for new crispr guide creation via PCR. | (Williams, Xu et al. 2017)              |
| <i>pPDR12-yEGFP</i> -pRS416             | <i>PDR12</i> promoter mediated expression of cytosol localised GFP. Positive 'Free GFP' control for confocal microscopy                   | (Williams, Xu et al. 2017)              |
| <i>MRPL19-GFP-MRPL19-LoxP</i> -pRS416   | <i>MRPL19</i> -GFP fusion protein expression construct with LoxPsym present in 3' UTR                                                     | This study                              |
| <i>MRPL19-GFP-MRPL19-Native</i> -pRS416 | <i>MRPL19</i> -GFP fusion protein expression construct with native 3' UTR                                                                 | This Study                              |
| <i>NOG2wt-GFP</i> -pRS416               | Native <i>NOG2</i> promoter, intron, ORF, and terminator with in-frame ORF-yEGFP fusion                                                   | This study                              |
| <i>NOG2syn-GFP</i> -pRS416              | Native <i>NOG2</i> promoter, no intron, ORF, and terminator with in-frame ORF-yEGFP fusion                                                | This study                              |
| tRNA-pRS413                             |                                                                                                                                           | This study                              |
| pHK-Cre-EBDh                            | amp, CEN6/ARS4, SCW11p-CRE_EBD-ter, hphMX4 - For estradiol induced expression of Cre-recombinase. Contains a hygromycin resistance marker | This study                              |
| pLM006                                  | amp, CEN6/ARS4, SCW11p-CRE_EBD-ter, HIS3 - For estradiol induced expression of Cre-recombinase. Contains a histidine auxotrophic marker   | (Hochrein, Mitchell et al. 2018)        |

**Table S4. Yeast strains used for polyploid construction, relates to Figure 7 and STAR Methods**

| Strain number | Strain name                                   | Ploidy | Relevant genotype                                                                                                                                                                                                                         | Reference               |
|---------------|-----------------------------------------------|--------|-------------------------------------------------------------------------------------------------------------------------------------------------------------------------------------------------------------------------------------------|-------------------------|
| 79            | BY4741(k)                                     | n      | <i>MATa, his3Δ1, leu2Δ0, met15Δ0, ura3Δ0, mnn9::kanMX4</i>                                                                                                                                                                                | Brachmann et al. (1998) |
| 80            | yLM896                                        | n      | <i>MATa, leu2Δ0, MET15, his3Δ1, ura3Δ0; synIII HO::syn.SUP61; SynIXL-synIXR; synVI WT.PRE4</i>                                                                                                                                            | Annaluru et al. (2014)  |
| 81            | yLM896(L)                                     | n      | <i>MATa, LEU2, MET15, his3Δ1, ura3Δ0; synIII HO::syn.SUP61; SynIXL-synIXR; synVI WT.PRE4</i>                                                                                                                                              | This study              |
| 82            | yLM896(H)                                     | n      | <i>MATa, leu2Δ0, MET15, HIS3, ura3Δ0; synIII HO::syn.SUP61; SynIXL-synIXR; synVI WT.PRE4</i>                                                                                                                                              | This study              |
| 83            | BY4742(L)                                     | n      | <i>MATa, his3Δ1, LEU2, lys2Δ0, ura3Δ0</i>                                                                                                                                                                                                 | This study              |
| 84            | BY4742(H)                                     | n      | <i>MATa, HIS3, leu2Δ0, lys2Δ0, ura3Δ0</i>                                                                                                                                                                                                 | This study              |
| 85            | BY4742 x<br>BY4741(k)<br>(WW)                 | 2n     | <i>MATa/a, his3Δ1/his3Δ1, leu2Δ0/leu2Δ0, lys2Δ0/LYS2, MET15/met15, ura3Δ0/ura3Δ0, MNN9/mnn9::kanMX4</i>                                                                                                                                   | This study              |
| 86            | yLM896 x<br>BY4741(k)<br>(WS)                 | 2n     | <i>MATa/a, his3Δ1/his3Δ1, leu2Δ0/leu2Δ0, lys2Δ0/LYS2, MET15/met15, ura3Δ0/ura3Δ0, MNN9/mnn9::kanMX4; chr III/synIII HO::syn.SUP61; chr IX/SynIXL-synIXR; chr VI/synVI WT.PRE4</i>                                                         | This study              |
| 87            | BY4742 x<br>BY4741(k) x<br>BY4742(L)<br>(WWW) | 3n     | <i>MATa/a/a, his3Δ1/his3Δ1/his3Δ1, leu2Δ0/leu2Δ0/LEU2, lys2Δ0/LYS2/lys2Δ0, MET15/met15/MET15, ura3Δ0/ura3Δ0/ura3Δ0/, MNN9/mnn9::kanMX4/MNN9</i>                                                                                           | This study              |
| 88            | BY4742 x<br>BY4741(k) x<br>yLM896(L)<br>(WWS) | 3n     | <i>MATa/a/a, his3Δ1/his3Δ1/his3Δ1, leu2Δ0/leu2Δ0/LEU2, lys2Δ0/LYS2/lys2Δ0, MET15/met15/MET15, ura3Δ0/ura3Δ0/ura3Δ0/, MNN9/mnn9::kanMX4/MNN9; chrIII/chrIII/synIII HO::syn.SUP61; chrIX/chrIX/SynIXL-synIXR; chrVI/chrVI/synVI WT.PRE4</i> | This study              |
| 89            | yLM896 x<br>BY4741(k) x<br>yLM896(L)          | 3n     | <i>MATa/a/a, his3Δ1/his3Δ1/his3Δ1, leu2Δ0/leu2Δ0/LEU2, lys2Δ0/LYS2/lys2Δ0,</i>                                                                                                                                                            | This study              |

|    |                                                                   |    |                                                                                                                                                                                                                                                                                                                                                                 |            |
|----|-------------------------------------------------------------------|----|-----------------------------------------------------------------------------------------------------------------------------------------------------------------------------------------------------------------------------------------------------------------------------------------------------------------------------------------------------------------|------------|
|    | (WSS)                                                             |    | <i>MET15/met15/MET15, ura3Δ0/ura3Δ0/ura3Δ0/, MNN9/mnn9::kanMX4/MNN9; chr III/synIII HO::syn.SUP61//synIII HO::syn.SUP61; chr IX/SynIXL-synIXR/SynIXL-synIXR; chr VI/synVI WT.PRE4/synVI WT.PRE4</i>                                                                                                                                                             |            |
| 90 | BY4742 x<br>BY4741(k) x<br>BY4742(L) x<br>BY4742(H)<br>(WWWW)     | 4n | <i>MATa/a/a/α, his3Δ1/his3Δ1/his3Δ1/HIS3, leu2Δ0/leu2Δ0/LEU2/leu2Δ0, lys2Δ0/LYS2/lys2Δ0/lys2Δ0, MET15/met15/MET15/MET15, ura3Δ0/ura3Δ0/ura3Δ0/ura3Δ0, MNN9/mnn9::kanMX4/MNN9/MNN9</i>                                                                                                                                                                           | This study |
| 91 | BY4742 x<br>BY4741(k) x<br>BY4742(L) x<br>yLM896(H)<br><br>(WWWS) | 4n | <i>MATa/a/a/α, his3Δ1/his3Δ1/his3Δ1/HIS3, leu2Δ0/leu2Δ0/LEU2/leu2Δ0, lys2Δ0/LYS2/lys2Δ0/LYS2, MET15/met15/MET15/MET15, ura3Δ0/ura3Δ0/ura3Δ0/ura3Δ0, MNN9/mnn9::kanMX4/MNN9/MNN9; chrIII/chrIII/chrIII/synIII HO::syn.SUP61; chrIX/chrIX/chrIX/SynIXL-synIXR; chrVI/chrVI/chrVI/synVI WT.PRE4</i>                                                                | This study |
| 92 | yLM896 x<br>BY4741(k) x<br>yLM896(L) x<br>BY4742(H)<br><br>(WWSS) | 4n | <i>MATa/a/a/α, his3Δ1/his3Δ1/his3Δ1/HIS3, leu2Δ0/leu2Δ0/LEU2/leu2Δ0, lys2Δ0/LYS2/lys2Δ0/lys2Δ0, MET15/met15/MET15/MET15, ura3Δ0/ura3Δ0/ura3Δ0/ura3Δ0, MNN9/mnn9::kanMX4/MNN9/MNN9; chrIII/chr III/synIII HO::syn.SUP61//synIII HO::syn.SUP61; chrIX/SynIXL-synIXR/SynIXL-synIXR/chrIX; chrVI/synVI WT.PRE4/synVI WT.PRE4/chrVI</i>                              | This study |
| 93 | yLM896 x<br>BY4741(k) x<br>yLM896(L) x<br>yLM896(H)<br><br>(WSSS) | 4n | <i>MATa/a/a/α, his3Δ1/his3Δ1/his3Δ1/HIS3, leu2Δ0/leu2Δ0/LEU2/leu2Δ0, lys2Δ0/LYS2/lys2Δ0/lys2Δ0, MET15/met15/MET15/MET15, ura3Δ0/ura3Δ0/ura3Δ0/ura3Δ0, MNN9/mnn9::kanMX4/MNN9/MNN9; chrIII/synIII HO::syn.SUP61/synIII HO::syn.SUP61//synIII HO::syn.SUP61; chrIX/SynIXL-synIXR/SynIXL-synIXR/SynIXL-synIXR/ chrVI/synVI WT.PRE4/synVI WT.PRE4/synVI WT.PRE4</i> | This study |

**Table S5.** Strain version table, relates to STAR Methods

| Version name     | Strain number                         | Comment                                                                                                                                                           | Details                                                                                                                                                                                                                                                                                                                                                                                                                                                                                                                                                                                                                                                                                                                                                                                                                                                                                                                                                                                                                                                                                                  |
|------------------|---------------------------------------|-------------------------------------------------------------------------------------------------------------------------------------------------------------------|----------------------------------------------------------------------------------------------------------------------------------------------------------------------------------------------------------------------------------------------------------------------------------------------------------------------------------------------------------------------------------------------------------------------------------------------------------------------------------------------------------------------------------------------------------------------------------------------------------------------------------------------------------------------------------------------------------------------------------------------------------------------------------------------------------------------------------------------------------------------------------------------------------------------------------------------------------------------------------------------------------------------------------------------------------------------------------------------------------|
| yeast_chr14_0_00 | NA                                    | Wild-type chromosome 14 sequence                                                                                                                                  | GenBank: BK006947.3                                                                                                                                                                                                                                                                                                                                                                                                                                                                                                                                                                                                                                                                                                                                                                                                                                                                                                                                                                                                                                                                                      |
| yeast_chr14_3_26 | NA                                    | Original design sequence                                                                                                                                          | Final design by BioStudio                                                                                                                                                                                                                                                                                                                                                                                                                                                                                                                                                                                                                                                                                                                                                                                                                                                                                                                                                                                                                                                                                |
| yeast_chr14_9_01 | SynXIV 29 I J1.4, Strain 39, Table S1 | synXIV Draft strain, with 5 TAG stop codons, 10 loxPsym sites missing, 23 wild-type, 4 point mutations causing amino acid changes, <i>YNL066W</i> intron present. | <b>Remaining TAG stop codons:</b> 125772 A->G, 336549 T->C, 400292 T->C, 400807 A->G, 690758 T->C. <b>Missing loxPsym sites:</b> 120565-120598, 125051-125084, 250019-250052, 337131-337164, 374188-374221, 438943-438976, 603336-603369, 690721-690754, 746919-746952, 747387-747420. <b>Wild-type PCRTags:</b> 108692-109106 YNL273W_525, 131105-131132 YNL264C_193,174923-174950 YNL243W_1380, 175389-175416 YNL243W_2607, 180372-180399 YNL242W_3522, 249297-249324 YNL201C_2362, 250194-250221 YNL200C_139, 250428-250455 YNL200C_373, 281076-281103 YNL183C_1189, 281403-281430 YNL183C_1516, 337177-337204 YNL148C_10, 337465-337492 YNL148C_298, 341073-341100 YNL144C_1021, 410750-410777 YNL106C_3133, 489097-489118 YNL066W_673, 491634-491661 YNL065W_609, 491925-491952 YNL065W_900, 495487-495514 YNL063W_360, 595657-595684 YNL005C_388, 658820-658847 YNR031C_4591, 689809-689836 YNR051C_19, 725470-725497 YNR065C_2761, 747793-747820 YNR073C_370, 748138-748165 YNR073C_715. <b>Point mutations that cause amino acid changes:</b> 12071 G->A, 140826 C->T, 396611 T->A, 450624 T->C. |
| yeast_chr14_9_02 | SynXIV 29 I J1.8, Strain 40, Table S1 | synXIV Draft strain, removed <i>MRPL19</i> LoxP site                                                                                                              | <b>Remaining TAG stop codons:</b> 125772 A->G, 336549 T->C, 400292 T->C, 400807 A->G, 690758 T->C. <b>Missing loxPsym sites:</b> 120565-120598, 125051-125084, 250019-250052, 337131-337164, 374188-374221, 438943-438976, 603336-603369, 690721-690754, 746919-746952, 747387-747420, 278873-278906. <b>Wild-type PCRTags:</b> 108692-109106 YNL273W_525, 131105-131132 YNL264C_193,174923-174950 YNL243W_1380, 175389-175416 YNL243W_2607, 180372-180399 YNL242W_3522, 249297-249324 YNL201C_2362, 250194-250221 YNL200C_139, 250428-250455 YNL200C_373, 281076-281103 YNL183C_1189, 281403-281430 YNL183C_1516, 337177-337204 YNL148C_10, 337465-337492                                                                                                                                                                                                                                                                                                                                                                                                                                               |



|                  |                                                                                                                                                                |                                                                                                                                                                                                                                                                                      |                                                                                                                                                                                                                                                                                                                                                                                                                                                                                                                                                                                                                                                                                                                                                                                                                                                                                                                                                                                                                                                                                                                                                                                                                                                                                                                                                                                                                                                  |
|------------------|----------------------------------------------------------------------------------------------------------------------------------------------------------------|--------------------------------------------------------------------------------------------------------------------------------------------------------------------------------------------------------------------------------------------------------------------------------------|--------------------------------------------------------------------------------------------------------------------------------------------------------------------------------------------------------------------------------------------------------------------------------------------------------------------------------------------------------------------------------------------------------------------------------------------------------------------------------------------------------------------------------------------------------------------------------------------------------------------------------------------------------------------------------------------------------------------------------------------------------------------------------------------------------------------------------------------------------------------------------------------------------------------------------------------------------------------------------------------------------------------------------------------------------------------------------------------------------------------------------------------------------------------------------------------------------------------------------------------------------------------------------------------------------------------------------------------------------------------------------------------------------------------------------------------------|
|                  |                                                                                                                                                                |                                                                                                                                                                                                                                                                                      | <p>YNL148C_298, 341073-341100 YNL144C_1021, 410750-410777<br/> YNL106C_3133, 489097-489118 YNL066W_673, 491634-491661<br/> YNL065W_609, 491925-491952 YNL065W_900, 495487-495514<br/> YNL063W_360, 595657-595684 YNL005C_388, 658820-658847<br/> YNR031C_4591, 689809-689836 YNR051C_19, 725470-725497<br/> YNR065C_2761, 747793-747820 YNR073C_370, 748138-748165<br/> YNR073C_715. <b>Point mutations that cause amino acid changes:</b><br/> 12071 G-&gt;A, 140826 C-&gt;T, 396611 T-&gt;A, 450624 T-&gt;C.</p>                                                                                                                                                                                                                                                                                                                                                                                                                                                                                                                                                                                                                                                                                                                                                                                                                                                                                                                               |
| yeast_chr14_9_03 | <p>SynXIV.17c<br/> NOG2 wt, A2-A3, V4, V1, R1,<br/> <i>YNL114W</i>,<br/> Chr12, K3,<br/> <i>YNL116W</i><sup>L697I</sup>,<br/> E3. Strain 77,<br/> Table S1</p> | <p>SynXIV draft strain. 3<br/> TAG stop codons changed<br/> to TAA, 4 LoxPsym sites<br/> added, 4 non-synonymous<br/> point mutations corrected,<br/> 3 PCR-tags added, and 18<br/> PCR tags removed during<br/> reconstruction and repair.<br/> <i>NOG2</i> intron re-inserted,</p> | <p><b>Remaining TAG stop codons:</b> 400292 T-&gt;C. <b>Missing loxPsym sites:</b><br/> 125051-125084, 250019-250052, 278873-278906, 337131-337164,<br/> 374188-374221, 438943-438976, 603336-603369, 715110-715143.<br/> <b>Wild-type PCRTags:</b> 108692-109106 YNL273W_525,116368-116395<br/> YNL271C_1528, 124292-124319 YNL268W_390, 124640-124667<br/> YNL268W_738, 124700-124727 YNL268W_798, 124901-124928<br/> YNL268W_999, 126914-126941 YNL267W_684, 127169-127196<br/> YNL267W_939, 128195-128222 YNL267W_1965, 128627-128654<br/> YNL267W_2397, 129047-129074 YNL267W_2817, 129242-129269<br/> YNL267W_3012, 131105-131132 YNL264C_193,174923-174950<br/> YNL243W_1380, 175389-175416 YNL243W_2607, 180372-180399<br/> YNL242W_3522, 249297-249324 YNL201C_2362, 250194-250221<br/> YNL200C_139, 250428-250455 YNL200C_373, 337177-337204<br/> YNL148C_10, 337465-337492 YNL148C_298, 341073-341100<br/> YNL144C_1021, 410750-410777 YNL106C_3133, 489097-489118<br/> YNL066W_673, 491634-491661 YNL065W_609, 491925-491952<br/> YNL065W_900, 495487-495514 YNL063W_360, 595657-595684<br/> YNL005C_388, 658820-658847 YNR031C_4591, 691283-691310<br/> YNR051C_484, 691337-691364 YNR051C_538, 691670-691697<br/> YNR051C_871, 696935-696962 YNR054C_58, 697238-697265<br/> YNR054C_361, 715318-715345 YNR061C_172, 715507-715534<br/> YNR061C_361. <b>Point mutations that cause amino acid changes:</b><br/> 450624 T-&gt;C.</p> |
| yeast_chr14_9_04 | <p>SynXIV.17c<br/> NOG2 wt, A2-A3, V4, V1, R1,<br/> <i>YNL114W</i>,<br/> Chr12, K3,<br/> <i>YNL116W</i><sup>L697I</sup>,</p>                                   | <p>SynXIV final strain. Non-<br/> synonymous point<br/> mutation in <i>IDH1</i> reverted<br/> to wild-type sequence</p>                                                                                                                                                              | <p><b>Remaining TAG stop codons:</b> 400292 T-&gt;C. <b>Missing loxPsym sites:</b><br/> 125051-125084, 250019-250052, 278873-278906, 337131-337164,<br/> 374188-374221, 438943-438976, 603336-603369, 715110-715143.<br/> <b>Wild-type PCRTags:</b> 108692-109106 YNL273W_525,116368-116395<br/> YNL271C_1528, 124292-124319 YNL268W_390, 124640-124667<br/> YNL268W_738, 124700-124727 YNL268W_798, 124901-124928<br/> YNL268W_999, 126914-126941 YNL267W_684, 127169-127196</p>                                                                                                                                                                                                                                                                                                                                                                                                                                                                                                                                                                                                                                                                                                                                                                                                                                                                                                                                                                |

|  |                                |  |                                                                                                                                                                                                                                                                                                                                                                                                                                                                                                                                                                                                                                                                                                                                                                                                                                                      |
|--|--------------------------------|--|------------------------------------------------------------------------------------------------------------------------------------------------------------------------------------------------------------------------------------------------------------------------------------------------------------------------------------------------------------------------------------------------------------------------------------------------------------------------------------------------------------------------------------------------------------------------------------------------------------------------------------------------------------------------------------------------------------------------------------------------------------------------------------------------------------------------------------------------------|
|  | E3, R1. Strain 78,<br>Table S1 |  | YNL267W_939, 128195-128222 YNL267W_1965, 128627-128654<br>YNL267W_2397, 129047-129074 YNL267W_2817, 129242-129269<br>YNL267W_3012, 131105-131132 YNL264C_193,174923-174950<br>YNL243W_1380, 175389-175416 YNL243W_2607, 180372-180399<br>YNL242W_3522, 249297-249324 YNL201C_2362, 250194-250221<br>YNL200C_139, 250428-250455 YNL200C_373, , 337177-337204<br>YNL148C_10, 337465-337492 YNL148C_298, 341073-341100<br>YNL144C_1021, 410750-410777 YNL106C_3133, 489097-489118<br>YNL066W_673, 491634-491661 YNL065W_609, 491925-491952<br>YNL065W_900, 495487-495514 YNL063W_360, 595657-595684<br>YNL005C_388, 658820-658847 YNR031C_4591, 691283-691310<br>YNR051C_484, 691337-691364 YNR051C_538, 691670-691697<br>YNR051C_871, 696935-696962 YNR054C_58, 697238-697265<br>YNR054C_361, 715318-715345 YNR061C_172, 715507-715534<br>YNR061C_361. |
|--|--------------------------------|--|------------------------------------------------------------------------------------------------------------------------------------------------------------------------------------------------------------------------------------------------------------------------------------------------------------------------------------------------------------------------------------------------------------------------------------------------------------------------------------------------------------------------------------------------------------------------------------------------------------------------------------------------------------------------------------------------------------------------------------------------------------------------------------------------------------------------------------------------------|
